# Supplementary material
Source: publisher figshare collection journal article supplement (https://tandf.figshare.com/articles/dataset/_/7123256)
Supplement: Supplementary file 1 [file 2]

| NPM trend | Effect on case study’s governance arrangements | Relevance of effects[[1]](#footnote-2) | | |
| --- | --- | --- | --- | --- |
| Copenhagen | Milan | Leipzig |
| Reorganization of PA | | | | |
| - Downsizing and externalization | Lack of area expertise within PAs  Overburdening of civil servants  Raising role of professional managers and experts | +/- | + | + |
| - Use of market instruments | Fund hunting and measures of performance are based on competition and bureaucracy  From services to (short-term) projects | + | ++ | ++ |
| Decentralization of partnerships and networks | | | | |
| - Decentralization (vertical subsidiarity) | Risk of “local trap”: inadequate local democratic arenas  Dependencies along hierarchies within networks  Passing the buck to local authorities | - | ++ | + |
| - Partnerships (Horizontal subsidiarity) | Governing networks: underestimated complexity of management (time, resources and expertise)  Passing the buck to private partners  “Grant coalitions”: limited space for new actors; transformation of grassroots organizations | + | + | ++ |
| Innovation | | | | |
| - Innovation | “Innovatitis”: initiatives have limited stability in project-based innovations  Discursive adaptation to “fashionable” innovation  Learning through failure is depreciated | + | + | ++ |

1. Interviewees’ opinions have been ranked on a 5-step scale: not relevant (--); poorly relevant (-); somehow relevant (+/-); quite relevant (+); very relevant (++). Ranking has been based according to agreement among different interviewees and to the extent they mention trends and effects in the table. [↑](#footnote-ref-2)
